# Supplementary material for: Polystyrene Microplastics Postpone APAP-Induced Liver Injury through Impeding Macrophage Polarization
Source: MDPI journal article supplement (doi:10.3390/toxics10120792), 2022-12-16
Supplement: s1 [file s1]

## **Supporting Information**

### **Polystyrene microplastics postpone APAP induced liver injury through impeding macrophage polarization**

Jing Liu<sup>1, 2, 3</sup>, Lecong Zhang<sup>1</sup>, Fang Xu<sup>1, 3</sup>, Songyan Meng<sup>1</sup>, Haitian Li<sup>1</sup>, Yang Song<sup>3, \*</sup>

1. College of Eco-Environmental Engineering, Guizhou Minzu University, Guiyang, 550025, China
2. The Institute of Karst Wetland Ecology, Guizhou Minzu University, Guiyang, 550025, China
3. State Key Laboratory of Environmental Chemistry and Ecotoxicology, Research Center for Eco-Environmental Sciences, Chinese Academy of Sciences, Beijing, 100085, China

\*Corresponding Author: State Key Laboratory of Environmental Chemistry and Ecotoxicology, Research Center for Eco-Environmental Sciences, Chinese Academy of Sciences, 18 Shuangqing Rd, Haidian District, Beijing, 100085, China; E-mail: yangsong@rcees.ac.cn

## Physicochemical property of PS MPs

To evaluate the impact of PS MPs on liver repair in APAP-induced liver injury model, the physicochemical property of the material was characterized. In Figure S1A, scanning electron microscopy (SEM) result indicates that MPs is round with a size of 300 nm. Further size distribution evaluation through dynamic light scattering (DLS) presented average size of MPs is approximately 320 nm (Figure 1B). From Figure 1C, the zeta potential of MPs is at low vacuum mode.

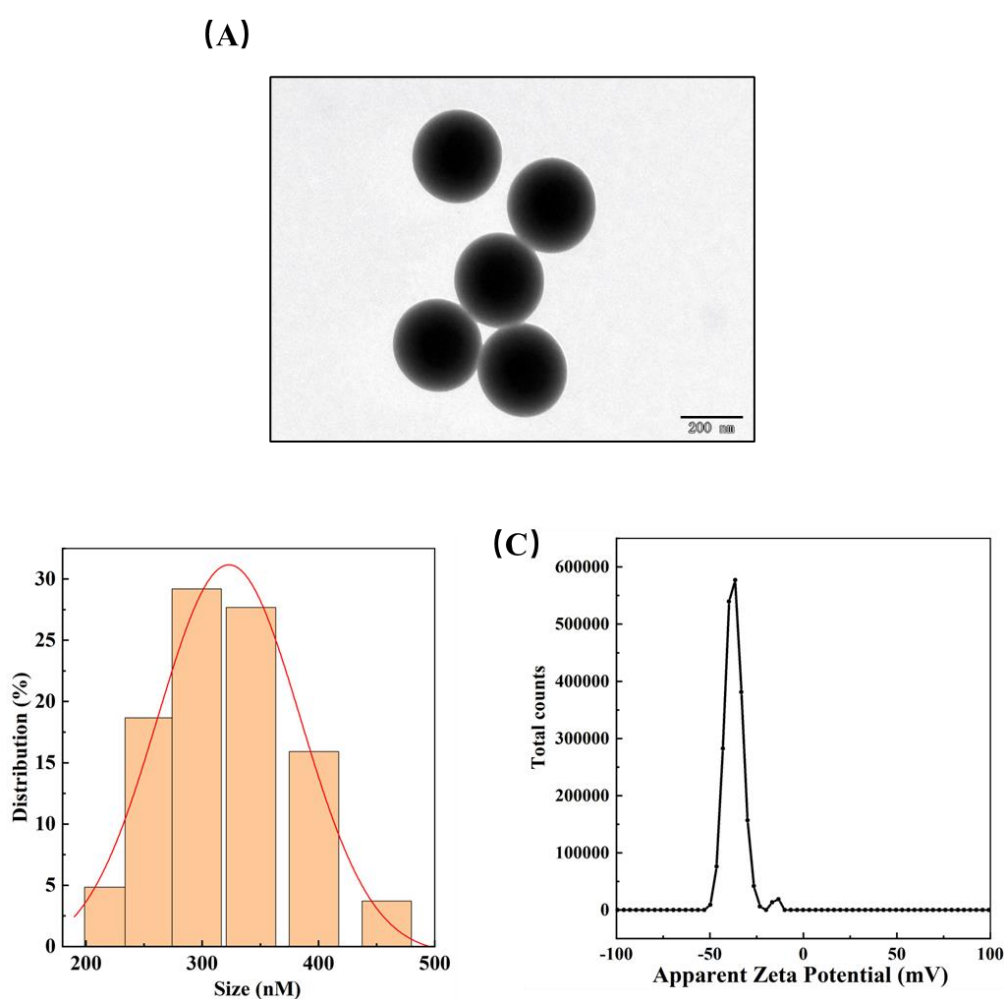

Figure S1 Physico-chemical characterization of PS MPs. (A) TEM images of PS MPs; (B) Hydrodynamic size and (C) zeta potential of PS MPs in distilled water.

Table S1. Sequences of all gene primers

| <i>S. No</i> | Name          | Primer sequences                                               |
|--------------|---------------|----------------------------------------------------------------|
| 1            | Hprt          | GCTTGCTGGTGAAAAGGACCTCTCGAAG<br>CCCTGAAGTACTCATTATAGTCAAGGGCAT |
| 2            | Cidea         | CCTTTGGTGCTAGGCTTGG<br>TTCAAGGCCGTGTTAAGGA                     |
| 3            | Foxm1b        | GTGTGCCTGTTCCCAAGC<br>CTGTTGTCCAGCGTGCAG                       |
| 4            | Tnf- $\alpha$ | CCCTCACACTCAGATCATCTTCT<br>GCTACGACGTGGGCTACAG                 |
| 5            | IL-6          | CCAGAGCTGTGCAGATGAGT<br>CTGCAGCCACTGGTTCTGT                    |
| 6            | IFN- $\gamma$ | CGGCACAGTCATTGAAAGCCTA<br>GTTGCTGATGGCCTGATTGTC                |
| 7            | IL-10         | GCTCTTACTGACTGGCATGAG<br>GCTCTTACTGACTGGCATGAG                 |
| 8            | Ly6G          | GACTTCCTGCAACACAACCTACC<br>ACAGCATTACCAGTGATCTCAGT             |
| 9            | Cxcl-1        | CTGGGATTCACCTCAAGAACATC<br>CAGGGTCAAGGCAAGCCTC                 |
| 10           | Ccl-2         | AGGTCCCTATGGTGCCAATGT<br>CGGCAGGATTTTGAGGTCCA                  |

---

|    |              |                                                      |
|----|--------------|------------------------------------------------------|
| 11 | CCR2         | CCACATCTCGTT CTCGGTTTATC<br>CAGGGAGCACC GTAATCATAATC |
| 12 | Cx3cr-1      | CAGCATCGACCGGTACCTT<br>GCTGCACTGTCCGGTTGTT           |
| 13 | iNOS         | TCTTTGACGCTCGGAACTGTAGCA<br>TAGGTCGATGCACAACTGGGTGAA |
| 14 | IL-1 $\beta$ | TGCCACCTTTTGACAGTGATG<br>AAGGTCCACGGGAAAGACAC        |
| 15 | Mrc1         | CTCTGTTCAGCTATTGGACGC<br>CGGAATTTCTGGGATTCAGCTTC     |
| 16 | Fizz1        | CCCTCCACTGTAACGAAGACTC<br>CACACCCAGTAGCAGTCATCC      |

---
